# Supplementary material for: Formation of a hybrid coordination-molecular complex
Source: Royal Society of Chemistry journal article supplement (doi:10.1039/b904908h), 2009-01-01
Supplement: b904908h.pdf [file b904908h.pdf]

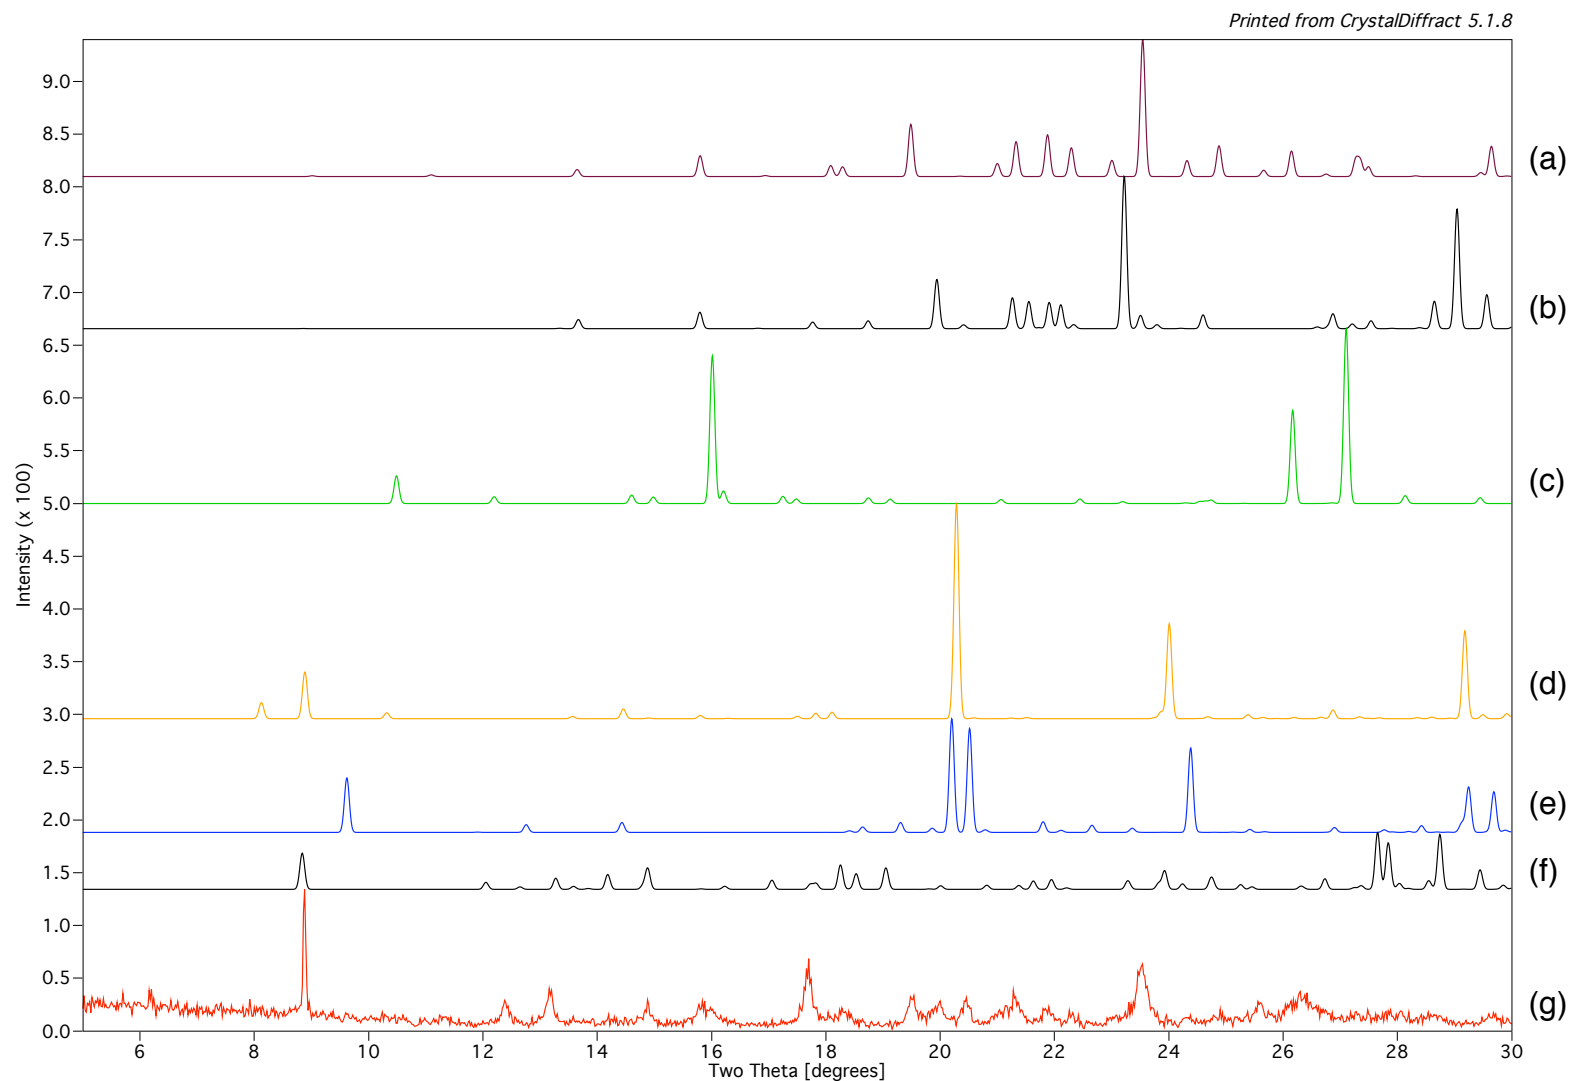

**Figure 1:** Comparison of powder pattern of ground material with the simulated patterns for starting materials and product, (a) 3,5-dinitrobenzoic acid (Form I), (b) 3,5-dinitrobenzoic acid (Form II), (c) 4-(dimethylamino) benzoic acid (Form I), (d) 4-(dimethylamino) benzoic acid (Form II), (e) 4-(dimethylamino)benzoic acid (Form III), (f) Li complex, (g) experimental pattern of ground sample.

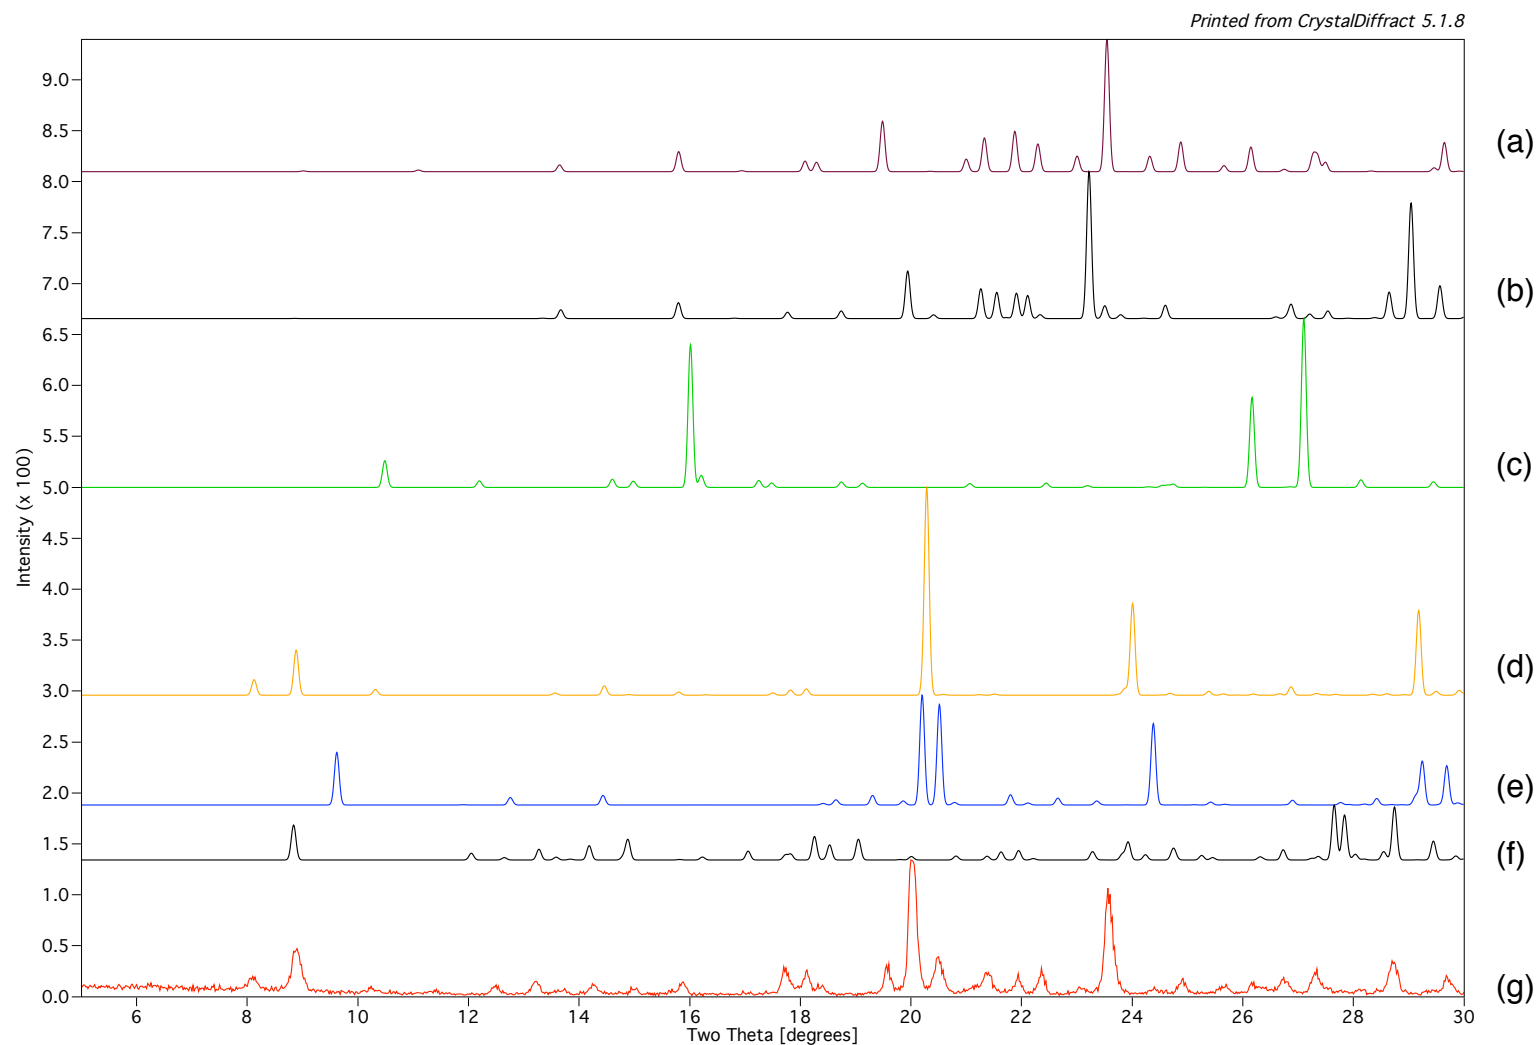

**Figure 2:** Comparison of powder pattern of thermally synthesized material with the simulated patterns for starting materials and product, (a) 3,5-dinitrobenzoic acid (Form I), (b) 3,5-dinitrobenzoic acid (Form II), (c) 4-(dimethylamino) benzoic acid (Form I), (d) 4-(dimethylamino) benzoic acid (Form II), (e) 4-(dimethylamino)benzoic acid (Form III), (f) Li complex, (g) experimental pattern of thermally synthesized sample.
